# Supplementary material
Source: PubMed Central journal article supplement (PMC6371661)
Supplement: ehp3766.s001.acco.pdf [file ehp3766.s001.acco.pdf]

**Note to readers with disabilities:** *EHP* strives to ensure that all journal content is accessible to all readers. However, some figures and Supplemental Material published in *EHP* articles may not conform to [508 standards](#) due to the complexity of the information being presented. If you need assistance accessing journal content, please contact [ehp508@niehs.nih.gov](mailto:ehp508@niehs.nih.gov). Our staff will work with you to assess and meet your accessibility needs within 3 working days.

### **Supplemental Material**

#### **Estimates of the Global Burden of Ambient PM<sub>2.5</sub>, Ozone, and NO<sub>2</sub> on Asthma Incidence and Emergency Room Visits**

Susan C. Anenberg, Daven K. Henze, Veronica Tinney, Patrick L. Kinney, William Raich, Neal Fann, Chris S. Malley, Henry Roman, Lok Lamsal, Bryan Duncan, Randall V. Martin, Aaron van Donkelaar, Michael Brauer, Ruth Doherty, Jan Eiof Jonson, Yanko Davila, Kengo Sudo, and Johan C.I. Kuylenstierna

#### **Table of Contents**

**Table S1.** Description of meta-analyses identified during literature review.

**Figure S1.** Regional average fraction of asthmatics visiting emergency room in last year, according to combinations of World Health Organization regions and World Bank income categorizations. Estimates were calculated from country-specific survey data shown in Table 1. Low = low income; LM = low-middle income; UM = upper middle income; High = high income.

**Figure S2.** Demographic inputs to the health impact function. (a) Gridded population (all ages) in 2015; (b) Country-specific asthma prevalence rate (per 100,000 people) in 2015; (c) Frequency and cumulative distribution of locations (of 54 countries and Hong Kong) with fraction of asthmatics visiting emergency room in last year; (d) as for (c) but mapped, with countries lacking survey data assigned regional average rates.

**Figure S3.** Ozone and NO<sub>2</sub> concentrations from different sources. (a) Standard deviation of annual average of 8-hour daily maximum ozone concentrations (ppb) in 2010 among the five HTAP chemical transport models. (b) Ratio of annual average 24-hr average NO<sub>2</sub> concentrations to annual average of 1-2pm NO<sub>2</sub> concentrations in 2010 simulated with the GMI-Replay model at 2°x2.5° resolution. (c) Difference between annual average NO<sub>2</sub> concentration (ppb) in 2015 derived from two different satellite column NO<sub>2</sub> products (OMI/Aura – DOMINO).

**Figure S4.** Sensitivity of estimated pollution-attributable asthma ERVs to different RR estimates, for all ages and children. Confidence intervals (95%) reflect error in the RR estimate only.

**Figure S5.** Number of asthma emergency room visits and new asthma cases in each region in 2015 among all ages (left) and children ages 0-17 years (right).

**Figure S6.** Percent of global and regional asthma ERVs for all ages in 2015 that are attributable to anthropogenic ozone (top) and PM<sub>2.5</sub> (bottom), using RR central estimates from three epidemiological meta-analyses.

**Figure S7.** Country-specific asthma ERVs per 100,000 people in 2015 attributable to PM<sub>2.5</sub>- and ozone. Panels (a-c) show results using total concentrations and RR estimates from Orellano et al. (2017), Zhang et al. (2016), and Zheng et al. (2015), respectively. Panels (d-f) show results using anthropogenic concentrations and the same RR estimates. Circle size indicates country population size. Dotted line indicates 1:1 line.

**Figure S8.** Percent of global and regional asthma incidence among children in 2015 that are attributable to anthropogenic PM<sub>2.5</sub> (top) and NO<sub>2</sub> (bottom), using RR central estimates from three epidemiological meta-analyses. Regions are defined by World Health Organization regions.

**Figure S9.** Asthma incidence among children aged 0-17 years attributable to PM<sub>2.5</sub>, using central RR estimates from Anderson et al. (2013) (a) Total concentrations, number of cases; (b) total concentrations, fraction of national asthma incidence; (c) anthropogenic concentrations, number of cases; (d) anthropogenic concentrations, fraction of national asthma incidence.

## Supplemental Tables

Table S1. Description of meta-analyses identified during literature review.

| Study                   | Pollutants                                                                                                           | Health endpoint               | Population                 | Study locations                                                                                                                                                |
|-------------------------|----------------------------------------------------------------------------------------------------------------------|-------------------------------|----------------------------|----------------------------------------------------------------------------------------------------------------------------------------------------------------|
| Orellano et al. (2017)  | Ozone, PM <sub>2.5</sub> , PM <sub>10</sub> , NO <sub>2</sub> , SO <sub>2</sub> , CO                                 | Asthma exacerbation           | All ages                   | US, UK, Taiwan, China, Denmark, France, Canada, Australia, Italy, Spain, Turkey, Japan                                                                         |
| Zheng et al. (2015)     | Ozone, PM <sub>2.5</sub> , PM <sub>10</sub> , NO <sub>2</sub> , SO <sub>2</sub> , CO                                 | Asthma exacerbation           | All ages, children, adults | Ireland, Spain, France, UK, Canada, US, India, Mexico, Croatia, Japan, Australia, Switzerland, Greece, China, Italy, Cuba, Brazil, Korea, Denmark, Netherlands |
| Zhang et al. (2016)     | Ozone, PM <sub>2.5</sub> , PM <sub>10</sub> , NO <sub>2</sub> , SO <sub>2</sub> , CO                                 | Asthma exacerbation           | All ages, children, adults | China, Taiwan, Japan, Korea                                                                                                                                    |
| Fan et al. (2016)       | PM <sub>2.5</sub>                                                                                                    | Asthma exacerbation           | Children, adults           | US, Canada, Finland, Taiwan                                                                                                                                    |
| Lim et al. (2016)       | PM <sub>2.5</sub>                                                                                                    | Asthma exacerbation           | Children                   | US, Canada, China, Denmark, Finland, Australia, Turkey                                                                                                         |
| Favarato et al. (2014)  | NO <sub>2</sub> (traffic related)                                                                                    | Prevalence of asthma symptoms | Children                   | Spain, US, Netherlands, Sweden, South Korea, Germany, China, France, Czech Republic                                                                            |
| Weinmayr et al. (2010)  | NO <sub>2</sub> , PM <sub>10</sub>                                                                                   | Prevalence of asthma symptoms | Children                   | Mainly US, Europe, and “other” not defined                                                                                                                     |
| Anderson et al. (2013)  | PM <sub>2.5</sub> , NO <sub>2</sub>                                                                                  | Asthma incidence              | All ages, children         | Sweden, Canada, Germany, US, UK, Norway, Netherlands                                                                                                           |
| Bowatte et al. (2014)   | PM <sub>2.5</sub> , PM <sub>10</sub> , black carbon, NO <sub>2</sub> , NO, NO <sub>x</sub> (all traffic related)     | Asthma incidence              | Children                   | Norway, Sweden, Germany, Canada, Netherlands, US, Denmark, Spain                                                                                               |
| Jacquemin et al. (2015) | PM <sub>2.5</sub> , PM <sub>10</sub> , NO <sub>2</sub> , traffic load, traffic intensity                             | Asthma incidence              | All ages, adults           | UK, Sweden, Netherlands, Germany                                                                                                                               |
| Khreis et al. (2017)    | PM <sub>2.5</sub> , PM <sub>10</sub> , NO <sub>2</sub> , NO <sub>x</sub> , black carbon (all traffic related)        | Asthma incidence              | Children                   | Netherlands, Canada, US, Germany, Sweden, England, Norway, Italy, Japan, Taiwan, China, Korea                                                                  |
| Gasana et al. (2012)    | PM <sub>2.5</sub> , PM <sub>10</sub> , NO <sub>2</sub> , NO <sub>x</sub> , CO, SO <sub>2</sub> (all traffic related) | Asthma incidence              | Children                   | France, Canada, Italy, China, US, Germany, Norway                                                                                                              |
| Takenoue et al. (2012)  | NO <sub>2</sub>                                                                                                      | Asthma incidence              | Children                   | Brazil, Canada, US, Norway, France, China, Japan                                                                                                               |

## Supplemental Figures

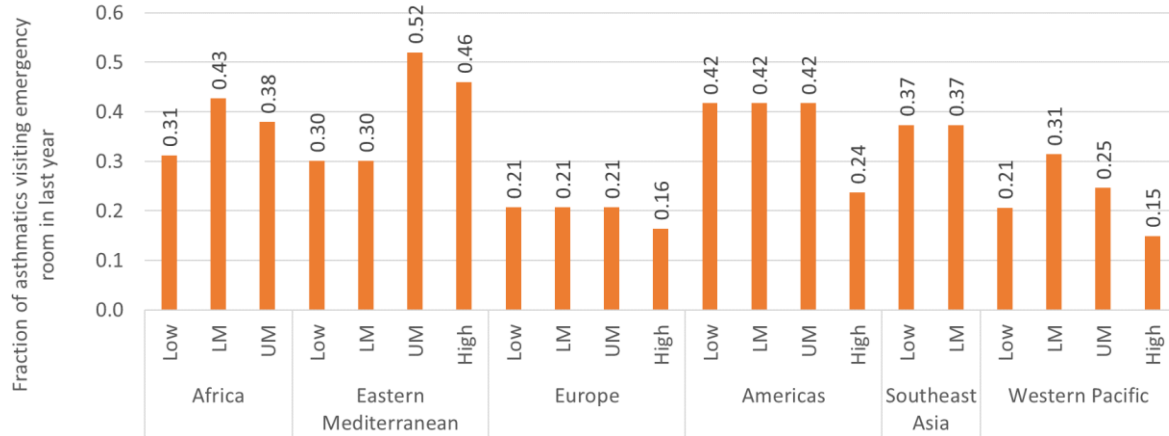

Figure S1. Regional average fraction of asthmatics visiting emergency room in last year, according to combinations of World Health Organization regions and World Bank income categorizations. Estimates were calculated from country-specific survey data shown in Table 1. Low = low income; LM = low-middle income; UM = upper middle income; High = high income.

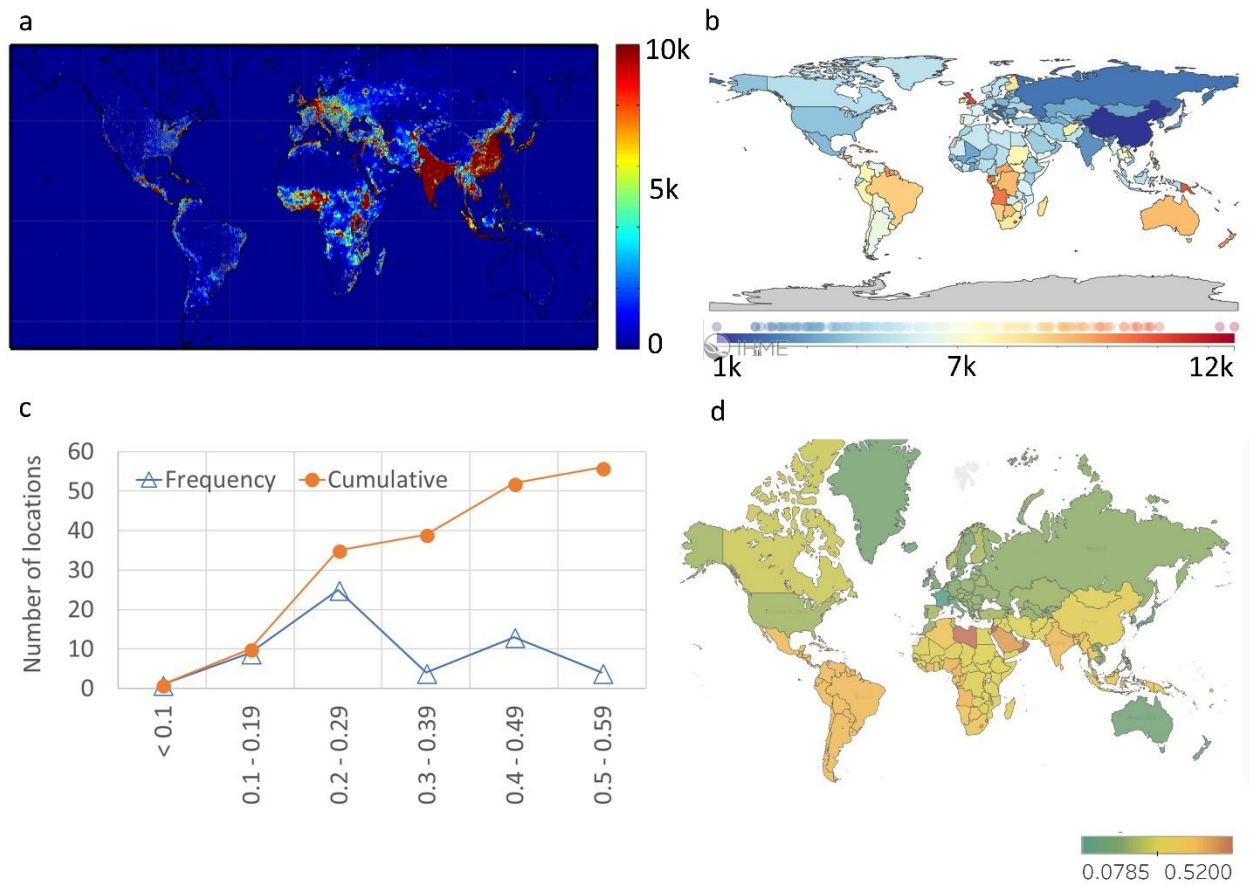

Figure S2. Demographic inputs to the health impact function. (a) Gridded population (all ages) in 2015; (b) Country-specific asthma prevalence rate (per 100,000 people) in 2015; (c) Frequency and cumulative distribution of locations (of 54 countries and Hong Kong) with fraction of asthmatics visiting emergency room in last year; (d) as for (c) but mapped, with countries lacking survey data assigned regional average rates.

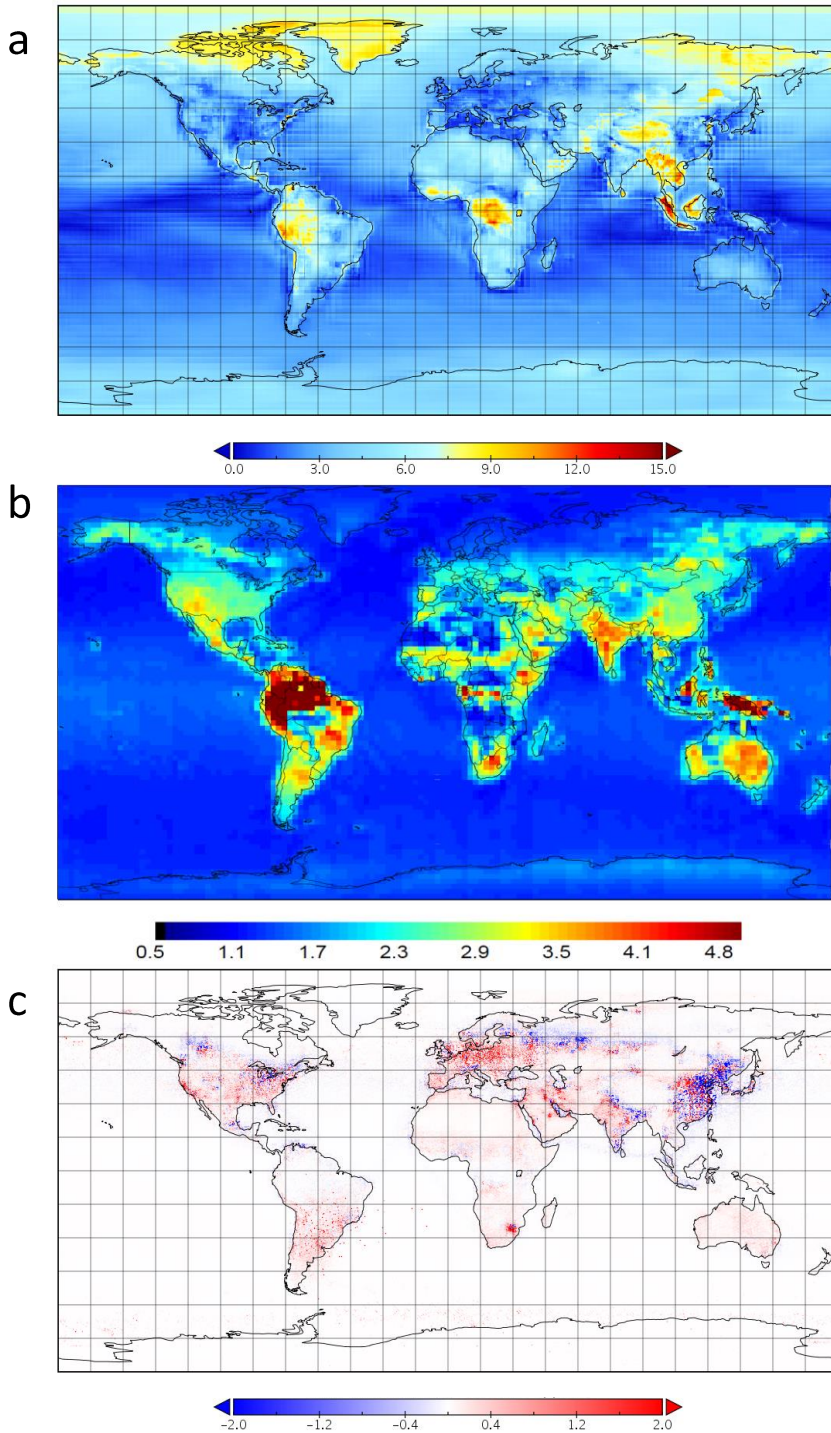

Figure S3. Ozone and NO<sub>2</sub> concentrations from different sources. (a) Standard deviation of annual average of 8-hour daily maximum ozone concentrations (ppb) in 2010 among the five HTAP chemical transport models. (b) Ratio of annual average 24-hr average NO<sub>2</sub> concentrations to annual average of 1-2pm NO<sub>2</sub> concentrations in 2010 simulated with the GMI-Replay model at 2°x2.5° resolution. (c) Difference between annual average NO<sub>2</sub> concentration (ppb) in 2015 derived from two different satellite column NO<sub>2</sub> products (OMI/Aura – DOMINO).

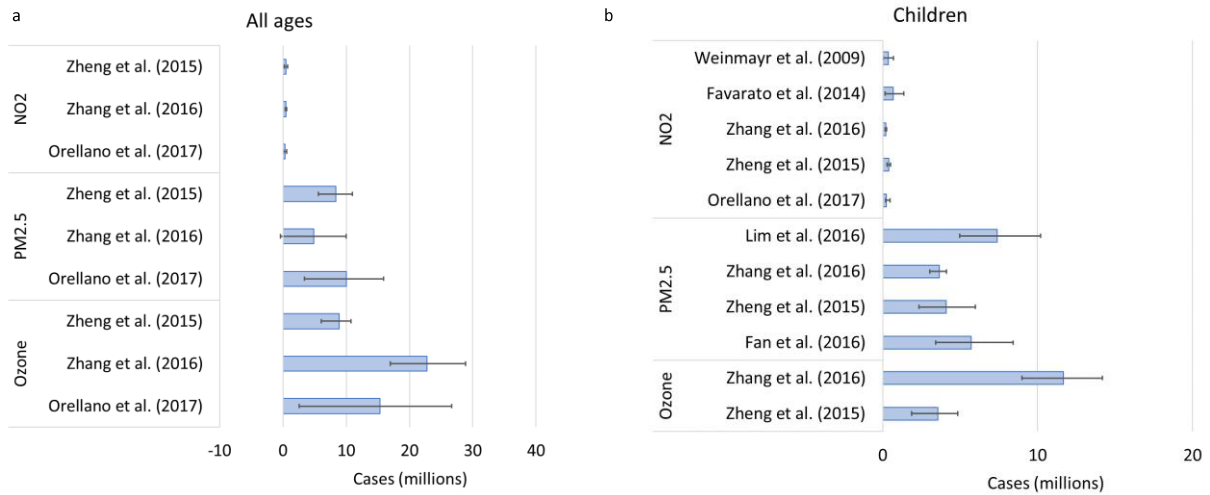

Figure S4. Sensitivity of estimated pollution-attributable asthma ERVs to different RR estimates, for all ages and children. Confidence intervals (95%) reflect error in the RR estimate only.

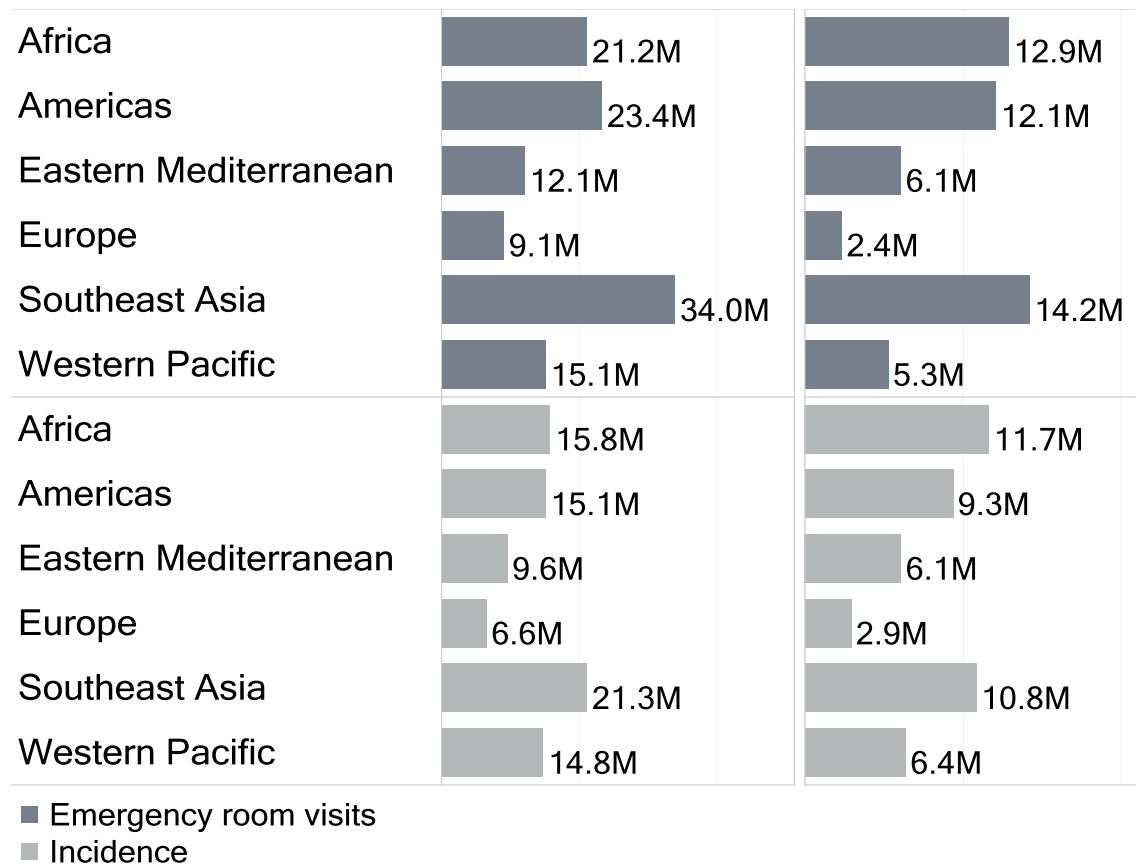

Figure S5. Number of asthma emergency room visits and new asthma cases in each region in 2015 among all ages (left) and children ages 0-17 years (right).



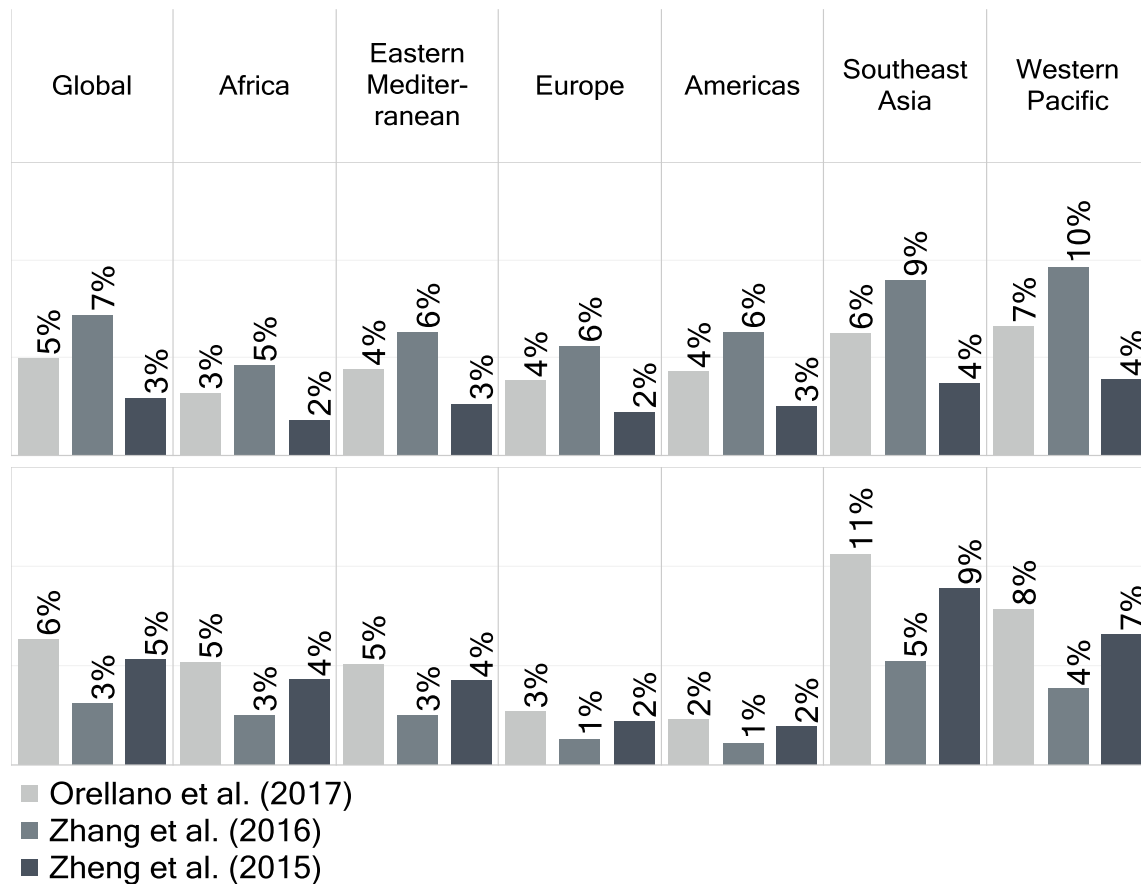

Figure S6. Percent of global and regional asthma ERVs for all ages in 2015 that are attributable to anthropogenic ozone (top) and PM<sub>2.5</sub> (bottom), using RR central estimates from three epidemiological meta-analyses.

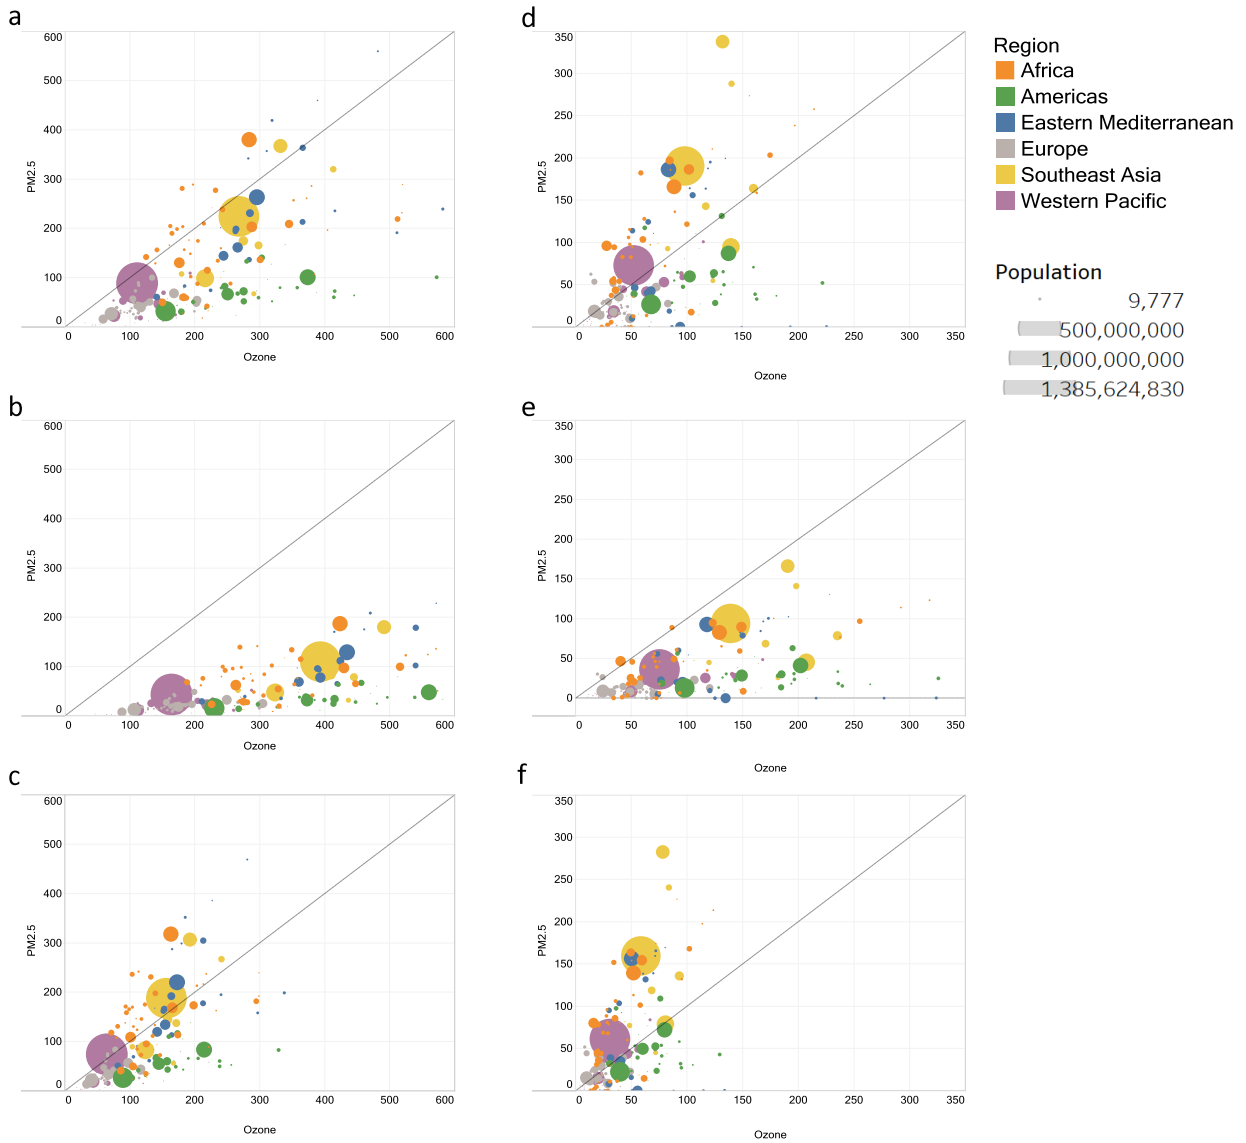

Figure S7. Country-specific asthma ERVs per 100,000 people in 2015 attributable to PM<sub>2.5</sub>- and ozone. Panels (a-c) show results using total concentrations and RR estimates from Orellano et al. (2017), Zhang et al. (2016), and Zheng et al. (2015), respectively. Panels (d-f) show results using anthropogenic concentrations and the same RR estimates. Circle size indicates country population size. Dotted line indicates 1:1 line.

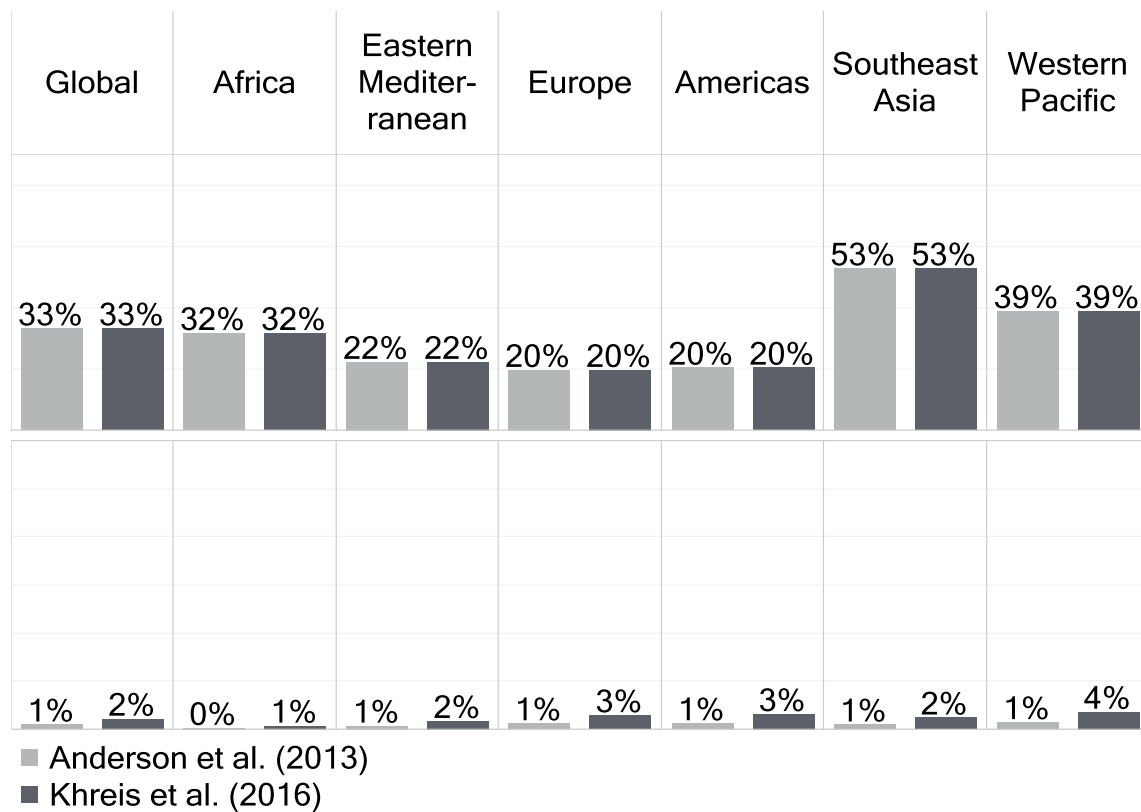

Figure S8. Percent of global and regional asthma incidence among children in 2015 that are attributable to anthropogenic PM<sub>2.5</sub> (top) and NO<sub>2</sub> (bottom), using RR central estimates from three epidemiological meta-analyses. Regions are defined by World Health Organization regions.

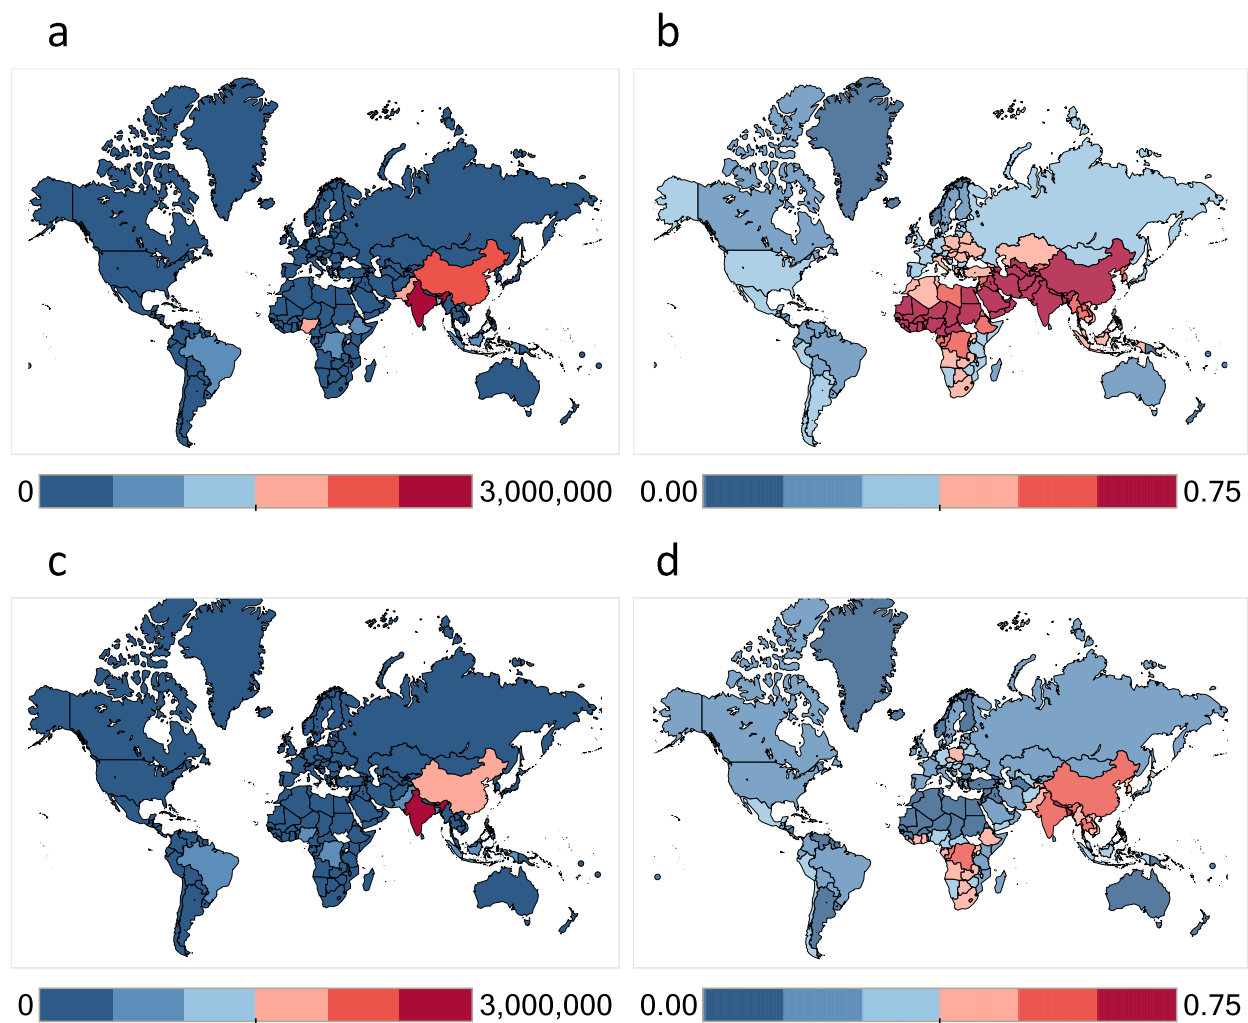

Figure S9. Asthma incidence among children aged 0-17 years attributable to PM<sub>2.5</sub>, using central RR estimates from Anderson et al. (2013) (a) Total concentrations, number of cases; (b) total concentrations, fraction of national asthma incidence; (c) anthropogenic concentrations, number of cases; (d) anthropogenic concentrations, fraction of national asthma incidence.
